# Supplementary material for: Synergism of the Combination of Traditional Antibiotics and Novel Phenolic Compounds against Escherichia coli
Source: PubMed Central journal article supplement (PMC7600547; doi:10.3390/pathogens9100811), 2020-10-03
Supplement: pathogens-09-00811-s001.pdf [file pathogens-09-00811-s001.pdf]

**Table S1:** Effects of hamamelitannin-erythromycin and gallic acid-ampicillin combinations on the viability of *Rattus norvegicus* small intestine (IEC-6) cells.

| <b>Antibacterials</b>                                 | <b>Inhibitory Concentration 50%<br/>(<math>\mu\text{M}</math>)</b> |
|-------------------------------------------------------|--------------------------------------------------------------------|
| Ampicillin                                            | 2556.66                                                            |
| Erythromycin                                          | 515.50                                                             |
| Gallic acid                                           | 564.55                                                             |
| Hamamelitannin                                        | 988.54                                                             |
| Gallic acid + (89-1431) $\mu\text{M}$ Ampicillin      | 1746.86                                                            |
| Ampicillin + (184-2939) $\mu\text{M}$ Gallic acid     | 828.90                                                             |
| Hamamelitannin + (43-681) $\mu\text{M}$ Erythromycin  | 564.55                                                             |
| Erythromycin + (65-1032) $\mu\text{M}$ Hamamelitannin | 777.09                                                             |

Results are interpreted from 3 independent experiments.
